# Supplementary material
Source: PubMed Central journal article supplement (PMC2945579)
Supplement: supp_M110.153825_supplement-Tables-final_with_ref-081710.pdf [file supp_M110.153825_supplement-Tables-final_with_ref-081710.pdf]

Table S1:

DNA sequences of primers used for constructing recombinant proteins and GAS mutants in the present study.

| Primer | Name           | Sequence                                            | Restriction sites |
|--------|----------------|-----------------------------------------------------|-------------------|
| 1      | GBSPy19-F      | CTGT <u><b>CTCGAG</b></u> GAGGATTTAAGTACTAAGATTGC   | <i>XhoI</i>       |
| 2      | GBSPy19-R      | AA <u><b>GGATCC</b></u> GTTAGTGTGGATAAATAAATGTAACAC | <i>BamHI</i>      |
| 3      | GB19Bam-UpNt   | TC <u><b>GGATCC</b></u> AGCGTTACAGGCTCAAGTAAG       | <i>BamHI</i>      |
| 4      | GB19Hin-UpCt   | TTT <u><b>AAGCTT</b></u> TCGCACCTACCATCGGCGTTG      | <i>HindIII</i>    |
| 5      | GB19Nco-DnNt   | AAAT <u><b>CCATGG</b></u> CTCCTTGGGCAGGAAA          | <i>NcoI</i>       |
| 6      | GB19Pst-DnCt   | TG <u><b>ACTGCAG</b></u> TTCAGCACTAGCACGC           | <i>PstI</i>       |
| 7      | upNt-Pr3       | GTCTAAGACGTTGGGGGAT                                 |                   |
| 8      | dnCt-Pr6       | GCCGTAGTAAGGCATCAC                                  |                   |
| 9      | aad9-F         | TTGGATCAGGAGTTGAGAGTGGAC                            |                   |
| 10     | aad9-R         | GCCACTGCATTTCCCGCAATATCT                            |                   |
| 11     | GB19C55-F      | CTC <u><b>GGATCC</b></u> GTGGGCACTGAGTATGCCTATGG    | <i>BamHI</i>      |
| 12     | GB19C55-R      | CCG <u><b>AAGCTT</b></u> ATTAAGTTGTAGCTGCTCCGAGGG   | <i>HindIII</i>    |
| 13     | GB19PDCHin-F   | TTCA <u><b>AAGCTT</b></u> GAAGGATAAGGTGTCTGAGTGAAG  | <i>HindIII</i>    |
| 14     | GB19PDCKpn-R   | AAC <u><b>GGTACC</b></u> GTCAATACTCTCAGAACTATTCC    | <i>KpnI</i>       |
| 15     | AMB93SPy19RN-F | TCCC <u><b>CCCGGG</b></u> ATGAAAAAAGAATTTTATCAGC    | <i>XmaI</i>       |
| 16     | AMB94SPy19RN-R | CGG <u><b>GGTACC</b></u> TTAGTGTGGATAAATAAATGTAAC   | <i>KpnI</i>       |

Bold underlined letters indicate the restriction enzyme sites.

Table S2: Strains used in the present study: ( two-pages)

| Strain                              | Characteristic/Description                                                                                                                                                                                 | Reference/source                               |
|-------------------------------------|------------------------------------------------------------------------------------------------------------------------------------------------------------------------------------------------------------|------------------------------------------------|
| E. coli XL1-blue                    | F':Tn10proA+B+lacIq □ (lacZ)M15/recA1endA1 gyrA96(Nal r)thi hsdR17 (rk- mk+) glnV44 relA1 lac                                                                                                              | Stratagene                                     |
| E. coli BL21(DE3)pLysS              | <i>E. coli</i> B F' dcm ompT hsdS(r <sub>B</sub> <sup>-</sup> m <sub>B</sub> <sup>-</sup> )gal λ(DE3)[pLysS Cam <sup>r</sup> ]                                                                             | Novagen                                        |
| E. coli MC1061                      | F'araD139 □ (ara-leu)7696 □ (lac)X74 galU galK hadR2(rk- mk+) mcrB1 rpsL (Str+)                                                                                                                            | From: Craig Rubens<br>(1)                      |
| <i>Streptococcus pyogenes</i> SF370 | Wild-type strain                                                                                                                                                                                           | ATCC 700294 (2)                                |
| <i>Staphylococcus aureus</i> RN4220 | A derivative RN450 (ATCC8325-4) a Toxic-shock syndrome exotoxin-negative indicator strain                                                                                                                  | From Barry Kreisworth, PHRI<br>(3)             |
| <b>Plasmid</b>                      |                                                                                                                                                                                                            |                                                |
| pET14B                              | Vector used for making recombinant protein with His-tag at the N-terminal- <i>Amp<sup>R</sup></i>                                                                                                          | Novagen                                        |
| pFW5                                | Suicide plasmid containing Spectinomycin <sup>R</sup> (aad9 resistance marker- <i>Spc<sup>R</sup></i> ) flanked by multiple cloning site (MCS-I) and MCS-II for constructing GAS mutant                    | Podbielski et al (4)<br>Jin and Pancholi (5)   |
| pDC123                              | Plasmid used for complementation experiments- Chloramphenicol <sup>R</sup> ( <i>Chl<sup>R</sup></i> )                                                                                                      | From: Craig Rubens (1)                         |
| pCN40tet                            | pCN40 ( <i>E. coli</i> - <i>S. aureus</i> shuttle vector) with ermC gene replaced by tet(M) from pCN36Plasmid used for complementing <i>Staphylococcus aureus</i> - tetracycline( <i>Tet<sup>R</sup></i> ) | Charpentier et al (6)<br>Beltramini et al (7). |
| pET14B-cdhA                         | pET14B plasmid with <i>spy0019/cdhA</i> insert without signal sequence                                                                                                                                     | This study                                     |
| pFW5-up19Ntct-1                     | pFW5 with upstream flanking region (930bp) in MCS-I( <i>Bam</i> H1 and <i>Hind</i> III)                                                                                                                    | This study                                     |
| pFW5-dn19Ntct-2                     | pFW5 with downstream flanking region (774bp) in MCS-II( <i>Nco</i> I and <i>Pst</i> I)                                                                                                                     | This study                                     |
| pFW5ΔcdhA                           | pFW5 with flanking up and down stream regions (930bp and 774bp) in MCS-I and –II respectively                                                                                                              | This study                                     |
| pFWCdhAΔC55                         | pFW5 with 1075bp (157-1231) insert of <i>cdhA</i> in MCS-I                                                                                                                                                 | This study                                     |
| pDC123-cdhA                         | pDC123 plasmid with <i>cdhA</i> insert between <i>Hind</i> III and <i>Kpn</i> I                                                                                                                            | This study                                     |
| pCN49-cdhA                          | pCN49tet plasmid with <i>cdhA</i> insert between <i>Xma</i> I and <i>Kpn</i> I                                                                                                                             | This study                                     |
| <b>Mutant strains</b>               |                                                                                                                                                                                                            |                                                |
| XL-1-cdhA                           | XL-1 blue <i>E. coli</i> containing pET14B- <i>cdhA</i> plasmid                                                                                                                                            | This study                                     |

|                       |                                                                                                                                                         |                      |
|-----------------------|---------------------------------------------------------------------------------------------------------------------------------------------------------|----------------------|
|                       | <i>Amp<sup>R</sup></i>                                                                                                                                  |                      |
| BL21-cdhA             | BL21(DE3)pLysS <i>E. coli</i> containing pET14B- <i>cdhA</i> plasmid and expressing CdhA without its signal sequence. <i>Amp<sup>R</sup></i>            | This study           |
| M1ΔSTK                | M1 SF370 lacking SPy1625 (SP-STK[eukaryotic-type serine/threonine kinase]) <i>Spectinomycin<sup>R</sup></i> ( <i>Spc<sup>R</sup></i> )                  | Jin and Pancholi (5) |
| M1ΔSTK:: <i>cdhA</i>  | M1ΔSTK complemented with wild-type <i>cdhA</i> - <i>Spc<sup>R</sup></i> and <i>ChloramphenicolR(Chl<sup>R</sup>)</i>                                    | This study           |
| M1ΔCdhA               | M1 SF370 lacking <i>cdhA</i> - <i>Spc<sup>R</sup></i>                                                                                                   | This study           |
| M1CdhAΔC55            | M1 SF370 expressing truncated CdhA without the C-terminal 55 residues that contributes to the catalytic site of the CHAP-domain- <i>Spc<sup>R</sup></i> | This study           |
| M1ΔCdhA:: <i>cdhA</i> | M1ΔCdhA mutant complemented with the wild-type <i>cdhA</i> - <i>Spc<sup>R</sup></i> - <i>Chl<sup>R</sup></i>                                            | This study           |
| M1-WT:: <i>cdhA</i>   | Wild-type M1 complemented with <i>cdhA</i> resulting in over expression of CdhA- <i>Chl<sup>R</sup></i>                                                 | This study           |
| RN4220:: <i>cdhA</i>  | Wild-type RN4220 complemented with <i>cdhA</i> resulting in over expression of CdhA- <i>tet<sup>R</sup></i>                                             | This study           |

\*References for Table S2

1. Chaffin D O, Rubens, C. E. (1998) Blue/white screening of recombinant plasmids in Gram-positive bacteria by interruption of alkaline phosphatase gene (*phoZ*) expression. *Gene* 219: 91-99.
2. Ferretti J J, McShan W M, Ajdic D, Savic D J, Savic G, Lyon, K. et al. (2001) Complete genome sequence of an M1 strain of *Streptococcus pyogenes*. *Proc Natl Acad Sci USA* 98: 4658-4663
3. Kreiswirth B, Lofdahl S, Betley M J, O'Reilly, M., Schlievert P M, Bergdoll Met (1983) The toxic shock syndrome exotoxin structural gene is not detectably transmitted by a prophage. *Nature* 305: 709-712.
4. Podbielski A, Spellerberg B, Woischnik M, Poh B, Luttkicken, R. (1996) Novel series of plasmid vectors for gene inactivation and expression analysis in group A streptococci (GAS). *Gene* 177: 137-147.
5. Jin H, Pancholi V (2006) Identification and biochemical characterization of a eukaryotic-type serine/threonine kinase and its cognate phosphatase in *Streptococcus pyogenes*: Their biological functions and substrate identification. *J Mol Biol* 357: 1351-1372.
6. Charpentier E, Anton A I, Barry P, Alfonso B, Fang Y, Novick R P (2004) Novel cassette-based shuttle vector system for Gram-positive bacteria. *Appl Environ Microbiol* 70: 6076-6085.
7. Beltramini A M, Mukhopadhyay C D, Pancholi V (2009) Modulation of cell wall structure and antimicrobial susceptibility by a *Staphylococcus aureus* eukaryotic-like serine/threonine kinase and phosphatase. *Infect Immun* 77: 1406-1416.

Table S3 : Primers sequences used for qRT-PCR assays in the present study.

| Gene ORF | Gene Symbol      | Sequence                   |                            |
|----------|------------------|----------------------------|----------------------------|
|          |                  | Forward                    | Reverse                    |
| SPy1152  | <i>gyrA</i>      | TTCGTATGGCTCAGTGGTTTAGTT   | CTGGTTCTCTTTCGCTTCCATCGT   |
| SPy1962  | <i>ProS</i>      | GGGTGGTTCTTGACAAGTCTATTGCG | TTCTGCCAAGGCATCTTCAGCA     |
| SPy0019  | <i>cdhA/sibA</i> | TCTTGTAAGTGGTGTACCCTCGG    | GCGCCTCAAGTTCTGTATTTCTTGCG |
| SPy0136  | <i>unknown</i>   | TTGGGACGGTACAGTTCGTTCTGA   | AGTGTGTGATTGACGGCCATAGGT   |
| SPy0148  | <i>ntpl</i>      | GCCATCGACAACAAGCAGCTCAAA   | AGGAATCGTTCCAACCTTTGCCGA   |
| SPy0167  | <i>slo</i>       | AGCTCCGCCACTCTTTGTGAGTAA   | CTCTGCAGCATCTCCTCC         |
| SPy0252  | <i>PTS</i>       | AAATGCTCAAAGATGCTGGCGTCC   | TGGTCACCACCTTGACCATTAGCA   |
| SPy0711  | <i>speC</i>      | AAGCGGCAGAATCGAAATTGGCAC   | TCTAGTCCCTTCATTTGGTGAGTC   |
| SPy0712  | <i>mf2</i>       | GCAATGACAGCCTGGCTAAACACA   | TCGAGGCACTACTTCATTGCCACT   |
| SPy0738  | <i>sagA</i>      | GCTGCTGTTGCTGCTGTACTACTT   | GCGTATAACTTCCGCTACCACCTT   |
| SPy0855  | <i>PTS</i>       | GCCATTTGTTATTGGTGGCGGGAT   | AGCTGATCATTGGCACACCAAGC    |
| SPy1058  | <i>PTS</i>       | GACCAAAGAGTTAAATGCGCCGCT   | CTTGTCTTTGGCGCGTGGATCATT   |
| SPy1294  | <i>malB</i>      | TTCTTTGAATCAGGACCGTGGA     | TTAGCTGGTGCTTGGTTGACTGC    |
| SPy1357  | <i>grab</i>      | ACTCACCTATCGAACAGCCTCGAA   | GCGTCTGTTTGATCCGCTAATGCT   |
| SPy1917  | <i>lacE</i>      | TTACCATGGGTGGTACTGGTGCAA   | CTGATGCACGTCCAATGGCTTTGT   |
| SPy1983  | <i>scl</i>       | AAATCTGGAATCAAGGGAGACCGTGG | TTTACCCGCGTTCACCGGTTTCA    |
| SPy2018  | <i>emm1</i>      | TTAGCGATAGACCAAGCGAGTCAG   | GCTTTGACGACTTGCGTCTGAGAT   |
| SPy2019  | <i>mga</i>       | GACCTTTCACGCTTGTTTCACCTC   | GTGACGCTGAGATTGAGCCTGATT   |
| SPy2039  | <i>speB</i>      | TTCTGCAGGTAGCTCTCGTGTTT    | TCGATAACAAAGGCATGTCCGCC    |
| SPy2200  | <i>hasA</i>      | GCCACATGACTATAAAGTTGCTGCTG | TTGACAAGGGAACGGTGAACGA     |

**Table S4:** Microarray-based differential gene expression analysis for M1 $\Delta$ CdhA vs the wild-type M1-SF370 (GSE#15546).

| ORF#<br>M1-<br>SF370 | Gene                           | Functional category                                              | Log <sub>2</sub> -fold<br>change<br>(M1ΔCdhA<br>vs M1-WT)<br>† | P value* |
|----------------------|--------------------------------|------------------------------------------------------------------|----------------------------------------------------------------|----------|
|                      |                                | <b>Amino acid transport and metabolism</b>                       |                                                                |          |
| SPy0184              | <i>opuABC</i>                  | putative glycine-betaine binding permease protein                | 2.05640                                                        | 0.00598  |
| <b>SPy1541</b>       | <i>arcC</i>                    | putative carbamate kinase                                        | -3.4416                                                        | 0.00153  |
| <b>SPy1542</b>       | -                              | putative Xaa-His dipeptidase                                     | -3.29318634                                                    | 0.00626  |
| <b>SPy1544</b>       | <i>arcB</i>                    | putative ornithine transcarbamylase                              | -2.93909102                                                    | 0.02302  |
| <b>SPy1547</b>       | <i>sagP</i><br>( <i>arcA</i> ) | streptococcal antitumor protein (possible arginine deiminase)    | -2.75651843                                                    | 0.02362  |
| SPy2189              | <i>sdhB</i>                    | putative L-serine dehydratase beta subunit                       | -1.63081526                                                    | 0.00773  |
| <b>SPy2190</b>       | <i>sdhA</i>                    | putative L-serine dehydratase alpha subunit                      | -1.78756811                                                    | 0.0179   |
|                      |                                | <b>Carbohydrate transport and metabolism</b>                     |                                                                |          |
| <b>SPy0146</b>       | -                              | putative regulatory protein                                      | -3.10918311                                                    | 0.00079  |
| SPy0255              | -                              | putative regulatory protein                                      | -3.58895686                                                    | 0.00364  |
| <b>SPy1057</b>       | -                              | Hypothetical protein                                             | -2.58079205                                                    | 0.03288  |
| <b>SPy1058</b>       | -                              | putative phosphotransferase system (PTS), enzyme II component B  | -2.95458551                                                    | 0.00816  |
| <b>SPy1059</b>       | -                              | putative phosphotransferase system (PTS), enzyme II, component C | -2.67254237                                                    | 0.01141  |
| <b>SPy1060</b>       | -                              | putative phosphotransferase system (PTS), enzyme II component D  | -2.16720074                                                    | 0.03663  |
| <b>SPy1292</b>       | <i>malM</i>                    | putative 4-alpha-glucanotransferase                              | -2.3532552                                                     | 0.04502  |
| <b>SPy1294</b>       | -                              | putative maltose/maltodextrin-binding protein                    | -2.08709915                                                    | 0.05454  |
| <b>SPy1301</b>       | <i>malC</i>                    | maltodextrin transport system permease                           | -2.72742748                                                    | 0.02236  |
| <b>SPy1304</b>       | <i>amyB</i>                    | putative cyclomaltodextrinase                                    | -2.58349588                                                    | 0.01888  |
| <b>SPy1707</b>       | <i>lacB.1</i>                  | putative galactose-6-phosphate isomerase                         | -2.80990347                                                    | 0.00963  |
| <b>SPy1708</b>       | <i>lacA.1</i>                  | putative galactose-6-phosphate isomerase                         | -2.88753155                                                    | 0.00565  |
|                      |                                | <b>Cell envelope biogenesis, outer</b>                           |                                                                |          |

|                       |               | <b>membrane</b>                                       |             |          |
|-----------------------|---------------|-------------------------------------------------------|-------------|----------|
| <b>SPy2201</b>        | <i>hasB</i>   | UDP-glucose 6-dehydrogenase                           | -5.83464339 | 1.08E-11 |
| <b>SPy2202</b>        | <i>hasC</i>   | UDP-glucose pyrophosphorylase                         | -4.7896666  | 5.12E-06 |
|                       |               | <b>Cell motility and secretion</b>                    |             |          |
| SPy0857               | <i>mur1.2</i> | putative peptidoglycan hydrolase                      | 1.775223248 | 0.04556  |
|                       |               | <b>DNA replication, recombination and repair</b>      |             |          |
| <b>SPy1563</b>        | -             | conserved hypothetical protein                        | -2.0734014  | 0.02289  |
|                       |               | <b>Energy production and conversion</b>               |             |          |
| <b>SPy0149</b>        | <i>ntpK</i>   | V-type Na <sup>+</sup> -ATPase subunit K              | -2.36833651 | 0.0096   |
| <b>SPy0150</b>        | <i>ntpE</i>   | putative V-type Na <sup>+</sup> -ATPase subunit E     | -2.83273618 | 0.00809  |
| <b>SPy0154</b>        | <i>ntpA</i>   | putative V-type Na <sup>+</sup> -ATPase alpha subunit | -3.07025116 | 0.00224  |
| <b>SPy0155</b>        | <i>ntpB</i>   | putative V-type Na <sup>+</sup> -ATPase subunit B     | -2.79904425 | 0.03036  |
| <b>SPy0157</b>        | <i>ntpD</i>   | putative V-type Na <sup>+</sup> -ATPase subunit D     | -2.89979146 | 0.00292  |
|                       |               | <b>Function unknown</b>                               |             |          |
| <b><u>SPy0019</u></b> | -             | putative secreted protein/ CdhA/sibA                  | -3.72812322 | 0.00025  |
| <b>SPy0136</b>        | -             | hypothetical protein                                  | -3.80404194 | 0.00027  |
| SPy0166               | -             | hypothetical protein                                  | -3.09748473 | 0.0004   |
| <b>SPy0170</b>        | -             | hypothetical protein                                  | -4.80814656 | 1.55E-05 |
| <b>SPy0256</b>        | -             | hypothetical protein                                  | -2.4527254  | 0.00655  |
| SPy0428               | -             | conserved hypothetical protein                        | -3.35991921 | 0.00024  |
| <b>SPy0430</b>        | -             | hypothetical protein                                  | -3.6328223  | 2.23E-05 |
| <b>SPy0433</b>        | -             | hypothetical protein                                  | -2.62327812 | 9.64E-05 |
| <b>SPy0435</b>        | -             | hypothetical protein                                  | -2.79926332 | 0.0008   |
| SPy0437               | -             | hypothetical protein                                  | -1.38948653 | 0.0458   |
| <b>SPy0743</b>        | -             | hypothetical protein                                  | -1.37395731 | 0.05468  |
| <b>SPy0861</b>        | -             | hypothetical protein                                  | -2.24634217 | 0.00658  |
| SPy1017               | -             | hypothetical protein                                  | 1.708325383 | 0.02793  |
| <b>SPy1543</b>        | -             | conserved hypothetical protein                        | -3.33026296 | 0.00269  |

|                |             |                                                                     |             |          |
|----------------|-------------|---------------------------------------------------------------------|-------------|----------|
| <b>SPy1562</b> | -           | conserved hypothetical protein                                      | -3.06442454 | 0.00091  |
| SPy1564        | -           | conserved hypothetical protein                                      | -2.44132327 | 0.00335  |
| <b>SPy1565</b> | -           | conserved hypothetical protein                                      | -2.9655306  | 0.00187  |
|                |             |                                                                     |             |          |
| SPy1686        | -           | hypothetical protein                                                | 1.562696323 | 0.03546  |
| <b>SPy1710</b> | -           | putative PTS system, enzyme IIB component                           | -2.00494928 | 0.02123  |
| SPy1832        | -           | hypothetical protein                                                | -1.53364716 | 0.02572  |
| <b>SPy1985</b> | -           | hypothetical protein                                                | -1.9194945  | 0.03479  |
|                |             | <b>General function prediction only</b>                             |             |          |
| <b>SPy0742</b> | -           | hypothetical protein                                                | -1.5674321  | 0.04718  |
|                |             | <b>Lipid metabolism</b>                                             |             |          |
| SPy1718        | -           | putative esterase                                                   | -2.13943137 | 0.01467  |
|                |             | <b>Posttranslational modification, protein turnover, chaperones</b> |             |          |
| <b>SPy0416</b> | <i>priS</i> | putative cell envelope proteinase                                   | -2.92746688 | 0.00015  |
|                |             | <b>Signal transduction</b>                                          |             |          |
| SPy1062        | -           | putative two-component response regulator                           | -2.24109495 | 0.02052  |
|                |             | <b>Transcription</b>                                                |             |          |
| <b>SPy1546</b> | -           | hypothetical protein                                                | -2.78005908 | 0.01756  |
|                |             | <b>Virulence factors</b>                                            |             |          |
| SPy0165        | <i>nga</i>  | NAD glycohydrolase precursor                                        | -4.70774684 | 2.27E-06 |
| SPy0167        | <i>slo</i>  | streptolysin O precursor                                            | -3.74007054 | 7.33E-05 |
| <b>SPy0711</b> | <i>speC</i> | pyrogenic exotoxin C precursor, phage associated                    | 1.784534856 | 0.0182   |
| <b>SPy0712</b> | <i>mf2</i>  | putative DNase (mitogenic factor), phage                            | 1.66593819  | 0.00257  |
| <b>SPy1302</b> | <i>amyA</i> | putative cyclomaltodextrin glucanotransferase                       | -2.74293186 | 0.02244  |
| SPy1357        | <i>grab</i> | protein GRAB (protein G-related ?2M-binding protein)                | 1.860433621 | 0.02545  |
| <b>SPy1983</b> | <i>scl</i>  | collagen-like surface protein                                       | -5.45831621 | 5.50E-06 |
| SPy2016        | <i>sic</i>  | inhibitor of complement-mediated lysis                              | -3.76662345 | 0.00078  |



|                |             |                      |             |          |
|----------------|-------------|----------------------|-------------|----------|
| <b>SPy2018</b> | <i>emm1</i> | M protein type 1     | -4.16572585 | 0.00012  |
| SPy2039        | <i>speB</i> | pyrogenic exotoxin B | -3.59998351 | 0.00128  |
| <b>SPy2043</b> | <i>mf</i>   | mitogenic factor     | -2.25560173 | 0.02301  |
| <b>SPy2200</b> | <i>hasA</i> | hyaluronate synthase | -7.19307349 | 6.59E-13 |

¶-- Microarray analysis and Log<sub>2</sub>-fold changes were derived from 11 independent experiments including dye-swap experiments as described in Material Methods using the CARMAweb software.

\*-- Differential gene expression value,  $\pm \text{Log}_2 \geq 1$  fold change with  $p \leq 0.05$ , was treated as significant change.

# -Open reading frame (ORF) numbers are based on the genome sequence data of type M1 GAS strain SF370 (2).

**OPR # in bold letters** are also found in M1CdhADC55 mutant (Table-S2)

Table S5. Microarray-based differential gene expression analysis for M1CdhAΔC55 vs M1SF-370 (GSE# 15598).

| ORF#<br>(M1-SF370)                           | Gene                           | Functional category and Product                                  | Log <sub>2</sub> -fold change<br>M1CdhADC55<br>vs.M1SF370¶ | P<br>Value* |
|----------------------------------------------|--------------------------------|------------------------------------------------------------------|------------------------------------------------------------|-------------|
| <b>Amino acid transport and metabolism</b>   |                                |                                                                  |                                                            |             |
| SPy0257                                      | <i>nanH</i>                    | putative acylneuraminate lyase                                   | -2.25493                                                   | 0.042168    |
| SPy1217                                      | -                              | putative glycine cleavage system H protein                       | -1.58447                                                   | 0.040303    |
| <b>SPy1541</b>                               | <i>arcC</i>                    | putative carbamate kinase                                        | -4.36467                                                   | 7.71E-06    |
| <b>SPy1542</b>                               | -                              | putative Xaa-His dipeptidase                                     | -5.34734                                                   | 1.97E-08    |
| <b>SPy1544</b>                               | <i>arcB</i>                    | putative ornithine transcarbamylase                              | -4.76064                                                   | 1.63E-06    |
| <b>SPy1547</b>                               | <i>sagP</i><br>( <i>arcA</i> ) | streptococcal antitumor protein (possible arginine deiminase)    | -4.46374                                                   | 1.23E-06    |
| <b>SPy2190</b>                               | <i>sdhA</i>                    | putative L-serine dehydratase alpha subunit                      | -1.83436                                                   | 0.013469    |
| <b>Carbohydrate transport and metabolism</b> |                                |                                                                  |                                                            |             |
| <b>SPy0146</b>                               | -                              | putative regulatory protein                                      | -2.70835                                                   | 0.0014      |
| SPy0251                                      | -                              | putative N-acetylmannosamine-6-P epimerase                       | -2.87709                                                   | 0.003248    |
| SPy0252                                      | -                              | putative sugar transporter sugar binding lipoprotein             | -2.93048                                                   | 0.000724    |
| SPy0254                                      | -                              | sugar transport system (permease)                                | -2.40877                                                   | 0.00528     |
| SPy0442                                      | -                              | putative glycerol-3-phosphate transporter                        | -2.10287                                                   | 0.008705    |
| SPy0854                                      | <i>fruB</i>                    | putative fructose-1-phosphate kinase                             | -3.43612                                                   | 4.05E-05    |
| <b>SPy1057</b>                               | -                              | hypothetical protein                                             | -4.92344                                                   | 4.41E-08    |
| <b>SPy1058</b>                               | -                              | putative phosphotransferase system (PTS), enzyme II component B  | -4.48982                                                   | 1.10E-06    |
| <b>SPy1059</b>                               | -                              | putative phosphotransferase system (PTS), enzyme II, component C | -4.35334                                                   | 1.11E-06    |
| <b>SPy1060</b>                               | -                              | putative phosphotransferase system (PTS), enzyme II component D  | -3.52878                                                   | 9.14E-05    |
| <b>SPy1292</b>                               | <i>malM</i>                    | putative 4-alpha-glucanotransferase                              | -3.11974                                                   | 0.00104     |
| <b>SPy1294</b>                               | -                              | putative maltose/maltodextrin-binding protein                    | -3.50005                                                   | 0.00015     |
| SPy1295                                      | <i>malF</i>                    | putative maltose/maltodextrin ABC transport system (permease)    | -3.02496                                                   | 0.004624    |

|                                                  |               |                                                                   |          |          |
|--------------------------------------------------|---------------|-------------------------------------------------------------------|----------|----------|
| SPy1296                                          | <i>malG</i>   | putative maltose/maltodextrin ABC transport system (permease)     | -1.82093 | 0.023356 |
| SPy1299                                          | <i>malD</i>   | putative maltodextrin transport system permease                   | -2.53865 | 0.00837  |
| <b>SPy1301</b>                                   | <i>malC</i>   | maltodextrin transport system permease                            | -3.62747 | 6.60E-05 |
| <b>SPy1304</b>                                   | <i>amyB</i>   | putative cyclomaltodextrinase                                     | -3.96239 | 3.67E-05 |
| SPy1306                                          | <i>malX</i>   | maltose/maltodextrin-binding protein                              | -3.63956 | 0.001779 |
| SPy1503                                          | -             | putative phosphomannomutase                                       | -2.00506 | 0.00482  |
| SPy1704                                          | <i>lacD.1</i> | putative tagatose 1,6-diphosphate aldolase                        | -2.07113 | 0.018109 |
| <b>SPy1707</b>                                   | <i>lacB.1</i> | putative galactose-6-phosphate isomerase                          | -3.03622 | 0.001591 |
| <b>SPy1708</b>                                   | <i>lacA.1</i> | putative galactose-6-phosphate isomerase                          | -2.45743 | 0.008592 |
| SPy1709                                          | -             | putative PTS system, enzyme IIC component                         | -2.82759 | 0.003145 |
| SPy1711                                          | -             | putative PTS system, enzyme IIA component                         | -2.49478 | 0.010317 |
| SPy1922                                          | <i>lacB.2</i> | putative galactose-6-phosphate isomerase (B subunit)              | -1.7812  | 0.036192 |
| SPy1923                                          | <i>lacA.2</i> | galactosidase acetyltransferase                                   | -2.52042 | 0.011223 |
| SPy1973                                          | <i>dexB</i>   | dextran glucosidase                                               | -2.20939 | 0.006815 |
| SPy2096                                          | <i>dexS</i>   | putative dextran glucosidase                                      | -1.6257  | 0.037289 |
| <b>Cell envelope biogenesis, outer membrane</b>  |               |                                                                   |          |          |
| SPy2201                                          | <i>hasB</i>   | UDP-glucose 6-dehydrogenase                                       | -4.53654 | 9.53E-07 |
| SPy2202                                          | <i>hasC</i>   | UDP-glucose pyrophosphorylase                                     | -3.8781  | 9.81E-05 |
| <b>Cell motility and secretion</b>               |               |                                                                   |          |          |
| SPy1976                                          | <i>msmK</i>   | multiple sugar-binding ABC transport system (ATP-binding protein) | -2.61871 | 0.000912 |
| <b>Coenzyme metabolism</b>                       |               |                                                                   |          |          |
| SPy1063                                          | -             | putative periplasmic-iron-binding protein                         | -2.00402 | 0.007379 |
| SPy1214                                          | <i>lplA</i>   | putative lipoate-protein ligase                                   | -1.58223 | 0.026625 |
| SPy1220                                          | -             | conserved hypothetical protein                                    | -1.52459 | 0.02995  |
| <b>DNA replication, recombination and repair</b> |               |                                                                   |          |          |
| <b>SPy1563</b>                                   | -             | conserved hypothetical protein                                    | -2.17083 | 0.00679  |
| <b>Energy production and conversion</b>          |               |                                                                   |          |          |
| SPy0148                                          | <i>ntpl</i>   | V-type Na <sup>+</sup> -ATPase subunit I                          | -3.78279 | 4.95E-05 |

|                         |             |                                                       |          |          |
|-------------------------|-------------|-------------------------------------------------------|----------|----------|
| <b>SPy0149</b>          | <i>ntpK</i> | V-type Na <sup>+</sup> -ATPase subunit K              | -3.76487 | 4.38E-05 |
| <b>SPy0150</b>          | <i>ntpE</i> | putative V-type Na <sup>+</sup> -ATPase subunit E     | -4.07994 | 3.00E-05 |
| SPy0151                 | <i>ntpC</i> | putative V-type Na <sup>+</sup> -ATPase subunit C     | -3.7906  | 8.06E-05 |
| <b>SPy0154</b>          | <i>ntpA</i> | putative V-type Na <sup>+</sup> -ATPase alpha subunit | -3.8587  | 5.44E-05 |
| <b>SPy0155</b>          | <i>ntpB</i> | putative V-type Na <sup>+</sup> -ATPase subunit B     | -4.13006 | 1.78E-05 |
| <b>SPy0157</b>          | <i>ntpD</i> | putative V-type Na <sup>+</sup> -ATPase subunit D     | -3.74782 | 2.40E-05 |
| SPy1218                 | -           | conserved hypothetical protein                        | -1.92363 | 0.010479 |
| SPy1849                 | <i>pfl</i>  | putative pyruvate formate-lyase                       | -2.32763 | 0.002428 |
| SPy2049                 | <i>pflD</i> | putative pyruvate formate-lyase 2                     | -1.44584 | 0.051227 |
| <b>Function unknown</b> |             |                                                       |          |          |
| <b>SPy0019</b>          | -           | putative secreted protein—CdhA/SibA                   | 1.76572  | 0.012404 |
| <b>SPy0136</b>          | -           | hypothetical protein                                  | -2.4309  | 0.014809 |
| SPy0147                 | -           | hypothetical protein                                  | -3.60598 | 0.000571 |
| <b>SPy0170</b>          | -           | hypothetical protein                                  | -3.225   | 0.001498 |
| <b>SPy0256</b>          | -           | hypothetical protein                                  | -2.98326 | 0.000944 |
| <b>SPy0430</b>          | -           | hypothetical protein                                  | -2.8642  | 0.002072 |
| <b>SPy0433</b>          | -           | hypothetical protein                                  | -1.89022 | 0.020243 |
| <b>SPy0435</b>          | -           | hypothetical protein                                  | -1.54147 | 0.050185 |
| SPy0739                 | <i>sagB</i> | streptolysin S associated ORF                         | -2.97651 | 0.00026  |
| SPy0740                 | <i>sagC</i> | streptolysin S associated ORF                         | -2.77969 | 0.001431 |
| SPy0741                 | -           | hypothetical protein                                  | -2.66414 | 0.001328 |
| <b>SPy0743</b>          | -           | hypothetical protein                                  | -2.44239 | 0.003764 |
| <b>SPy0861</b>          | -           | hypothetical protein                                  | -2.34387 | 0.033703 |
| SPy1216                 | -           | hypothetical protein                                  | -1.99825 | 0.011072 |
| SPy1298                 | <i>malA</i> | putative maltodextrose utilization protein            | -2.15022 | 0.016366 |
| <b>SPy1543</b>          | -           | conserved hypothetical protein                        | -4.54638 | 5.13E-07 |
| <b>SPy1562</b>          | -           | conserved hypothetical protein                        | -1.97883 | 0.006385 |
| <b>SPy1565</b>          | -           | conserved hypothetical protein                        | -2.31821 | 0.002193 |
| SPy1680                 | -           | putative transcriptional regulatory protein           | -1.6107  | 0.020366 |

|                                                                     |             |                                                                       |          |          |
|---------------------------------------------------------------------|-------------|-----------------------------------------------------------------------|----------|----------|
| <b>SPy1710</b>                                                      | -           | putative PTS system, enzyme IIB component                             | -2.48215 | 0.011916 |
| <b>SPy1985</b>                                                      | -           | hypothetical protein                                                  | -2.13957 | 0.007286 |
| SPy2066                                                             | -           | putative dipeptidase                                                  | -1.73751 | 0.024801 |
| SPy2191                                                             | -           | hypothetical protein                                                  | 1.753186 | 0.017852 |
| <b>General function prediction only</b>                             |             |                                                                       |          |          |
| SPy0044                                                             | <i>adhA</i> | putative alcohol dehydrogenase I                                      | -3.09639 | 0.00021  |
| SPy0519                                                             | -           | conserved hypothetical protein                                        | -1.645   | 0.046764 |
| <b>SPy0742</b>                                                      | -           | hypothetical protein                                                  | -2.87017 | 0.000685 |
| SPy0745                                                             | <i>sagH</i> | ABC transporter (ATP-binding protein) - streptolysin S associated ORF | -2.57412 | 0.001301 |
| SPy0746                                                             | -           | putative ABC transporter (ATP-binding protein)                        | -2.14013 | 0.002678 |
| SPy0747                                                             | -           | conserved hypothetical protein                                        | -1.95705 | 0.010762 |
| SPy1113                                                             | -           | putative acid phosphatase (class B)                                   | -1.7422  | 0.028163 |
| SPy1567                                                             | -           | conserved hypothetical protein                                        | -1.73871 | 0.012842 |
| SPy1693                                                             | -           | putative reductase / dehydrogenase                                    | -1.31522 | 0.039902 |
| <b>Lipid metabolism</b>                                             |             |                                                                       |          |          |
| SPy1751                                                             | <i>fabK</i> | putative trans-2-enoyl-ACP reductase II                               | 1.255345 | 0.04672  |
| SPy0022                                                             | <i>plsX</i> | putative fatty acid/phospholipid synthesis protein                    | 1.398864 | 0.035703 |
| SPy1753                                                             | <i>acpP</i> | putative acyl carrier protein                                         | 1.482747 | 0.041113 |
| <b>Nucleotide transport and metabolism</b>                          |             |                                                                       |          |          |
| SPy0830                                                             | <i>pyrR</i> | putative pyrimidine regulatory protein                                | 1.680411 | 0.025495 |
| SPy0832                                                             | <i>pyrB</i> | putative aspartate transcarbamoylase                                  | 1.811749 | 0.014822 |
| SPy0900                                                             | <i>pyrF</i> | putative orotidine-5'-decarboxylase PyrF                              | 2.225126 | 0.008888 |
| <b>Posttranslational modification, protein turnover, chaperones</b> |             |                                                                       |          |          |
| SPy0379                                                             | <i>pflC</i> | putative pyruvate-formate lyase activating enzyme                     | -1.73878 | 0.028716 |
| <b>SPy0416</b>                                                      | <i>prtS</i> | putative cell envelope proteinase                                     | -2.13093 | 0.003128 |
| Secondary metabolites biosynthesis, transport and catabolism        |             |                                                                       |          |          |
| SPy0744                                                             | -           | Putative ABC transporter (ATP-binding protein)                        | -2.74699 | 0.000836 |
| <b>Signal transduction mechanisms</b>                               |             |                                                                       |          |          |

|                |             |                                                                |          |          |
|----------------|-------------|----------------------------------------------------------------|----------|----------|
| SPy1061        | -           | putative two-component sensor histidine kinase                 | -2.43915 | 0.005105 |
|                |             | <b>Transcription</b>                                           |          |          |
| SPy0853        | -           | putative transcriptional repressor                             | -3.96736 | 8.99E-07 |
| SPy1062        | -           | putative two-component response regulator                      | -2.2121  | 0.024562 |
| <b>SPy1546</b> | -           | hypothetical protein                                           | -4.67337 | 1.47E-06 |
|                |             | <b>Translation</b>                                             |          |          |
| SPy0145        | -           | conserved hypothetical protein                                 | -1.61106 | 0.024883 |
| SPy1613        | -           | conserved protein - function unknown                           | -1.60667 | 0.021384 |
|                |             | <b>Virulence genes</b>                                         |          |          |
| <b>SPy0711</b> | <i>speC</i> | pyrogenic exotoxin C precursor, phage associated               | 1.64463  | 0.032466 |
| <b>SPy0712</b> | <i>mf2</i>  | putative DNase (similar to mitogenic factor), phage associated | 1.652306 | 0.026745 |
| <b>SPy0738</b> | <i>sagA</i> | streptolysin S associated protein                              | -2.45486 | 0.004107 |
| <b>SPy1302</b> | <i>amyA</i> | putative cyclomaltodextrin glucanotransferase                  | -3.63063 | 4.88E-05 |
| <b>SPy1436</b> | <i>mf3</i>  | putative deoxyribonuclease                                     | 2.130089 | 0.008555 |
| <b>SPy1983</b> | <i>scl</i>  | collagen-like surface protei                                   | -4.48531 | 3.10E-06 |
| <b>SPy2018</b> | <i>emm1</i> | M protein type 1                                               | -2.90199 | 0.000887 |
| <b>SPy2043</b> | <i>mf</i>   | mitogenic factor                                               | -1.67711 | 0.021443 |
| <b>SPy2200</b> | <i>hasA</i> | hyaluronate synthase                                           | -4.61878 | 4.43E-06 |

¶-- Microarray analysis and Log<sub>2</sub>-fold changes were derived from 7 independent experiments including dye-swap experiments using the CARMAweb software as described in Materials and Methods .

\*-- Differential gene expression value,  $\pm \text{Log}_2 \geq 1$  fold change with  $p \leq 0.05$ , was treated as significant change.

# -Open reading frame (ORF) numbers are based on the genome sequence data of type M1 GAS strain SF370 (2).

**OPR # in bold letters** are also found in M1ΔCdhA mutant (Table S1).

Table S6: Comparison of expression profiles of 18 relevant genes in M1ΔCdhA by qRT-PCR and by microarray analyses.

| Gene    | Log2 fold change (M1ΔCdhA) |            |
|---------|----------------------------|------------|
|         | Microarray                 | qRT-PCR    |
| SPy0019 | -3.73                      | -13.636948 |
| SPy0136 | -3.8                       | -2.2155798 |
| SPy0148 | -2.35                      | -7.062746  |
| SPy0167 | -3.74                      | 0.61447428 |
| SPy0252 | -1.46                      | -7.4752142 |
| SPy0711 | 1.78                       | -6.22      |
| SPy0712 | 1.67                       | -8.28      |
| SPy0738 | -1.4                       | -3.88      |
| SPy0855 | -0.81                      | -7.57      |
| SPy1057 | -2.95                      | -0.549     |
| SPy1294 | -2.09                      | -4.54      |
| SPy1357 | 1.86                       | -3.6       |
| SPy1917 | -1.37                      | -9.16      |
| SPy1983 | -5.46                      | -8.69      |
| SPy2018 | -4.17                      | -5.4       |
| SPy2019 | -1.24                      | -1.2       |
| SPy2039 | -3.6                       | -4.0       |
| SPy2200 | -7.19                      | -3.0       |

| Gene    | Log2 fold change (M1CdhAΔC55) |         |
|---------|-------------------------------|---------|
|         | Microarray                    | qRT-PCR |
| SPy0019 | 1.76                          | -0.29   |
| SPy0136 | -2.43                         | 0.34    |
| SPy0148 | -3.78                         | -2.32   |
| SPy0167 | -0.78                         | -1.55   |
| SPy0252 | -2.93                         | -3.32   |
| SPy0711 | 1.64                          | 0.76    |
| SPy0712 | 1.65                          | -0.69   |
| SPy0738 | -2.45                         | -1.56   |
| SPy0855 | -1.64                         | -1.12   |
| SPy1057 | -4.48                         | -2.36   |
| SPy1294 | -3.5                          | -9.96   |
| SPy1357 | 1.05                          | -6.646  |
| SPy1917 | -1.56                         | -2.74   |
| SPy1983 | -4.48                         | -1.09   |
| SPy2018 | -2.9                          | -1.0    |
| SPy2019 | -0.35                         | -1.61   |
| SPy2039 | -0.62                         | -4.54   |
| SPy2200 | -4.6                          | -4.35   |
